# Supplementary material for: Enhanced Visible Light-Driven Photocatalytic Water-Splitting Reaction of Titanate Nanotubes Sensitised with Ru(II) Bipyridyl Complex
Source: MDPI journal article supplement (doi:10.3390/nano13222959), 2023-11-16
Supplement: s1 [file s1]

**Enhanced Visible–Light–Driven Photocatalytic  
Water–Splitting Reaction of Titanate Nanotubes sensitized  
with Ru(II) Bipyridyl Complex**

Mauro Malizia <sup>1</sup>, Stuart A. Scott <sup>2</sup>, Laura Torrente-Murciano <sup>1</sup>, Adam M. Boies <sup>2</sup>, Talal A. Aljohani <sup>3</sup> and Herme G. Baldovi <sup>1,\*</sup>

<sup>1</sup> Department of Chemical Engineering and Biotechnology, University of Cambridge,  
Philippa Fawcett Drive, Cambridge CB3 0AS, UK

<sup>2</sup> Department of Engineering, University of Cambridge, Trumpington Street, Cambridge  
CB2 1PZ, UK

<sup>3</sup> Refining and Petrochemical Technology Institute, King Abdulaziz City for Science  
and Technology, Riyadh 11442, Saudi Arabia

\*Corresponding author email address: hergarba@cam.upv.es

**Supporting Information**

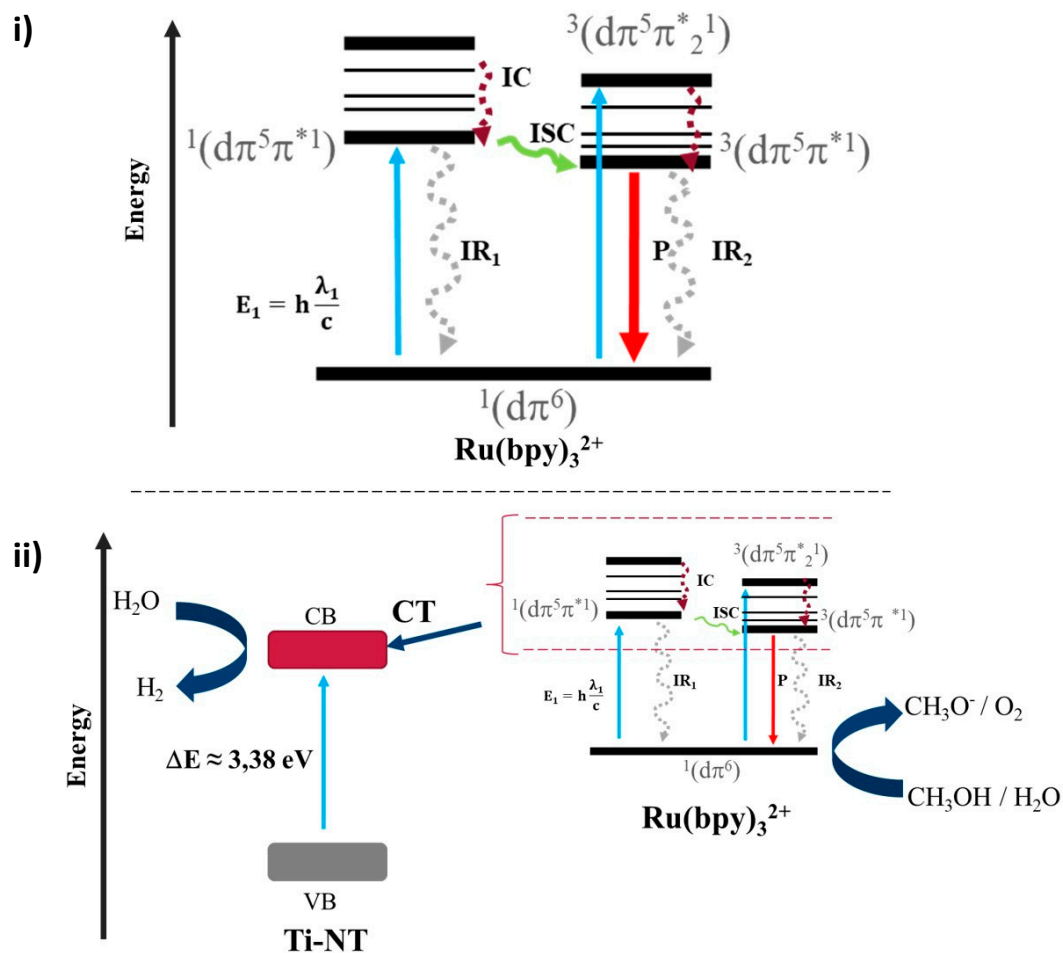

**Scheme S1.**  $h \cdot \lambda / c$  = energy of the visible light photon. P = Phosphorescence emission. IC= Internal conversion. ISC = Intersystem crossing from  $1(d\pi^5\pi^{*1})$  to  $3(d\pi^5\pi^{*1})$ . IR= Internal relaxation. CT = Charge Transfer. **i)** Scheme of Jablonski diagram of an isolated  $\text{Ru(bpy)}_3^{2+}$ . **ii)** Proposed energy diagram scheme of the composite  $(\text{Ru(bpy)}_3)\text{Ti-NT}$  when excited with visible light and performs the water splitting reaction.[1]

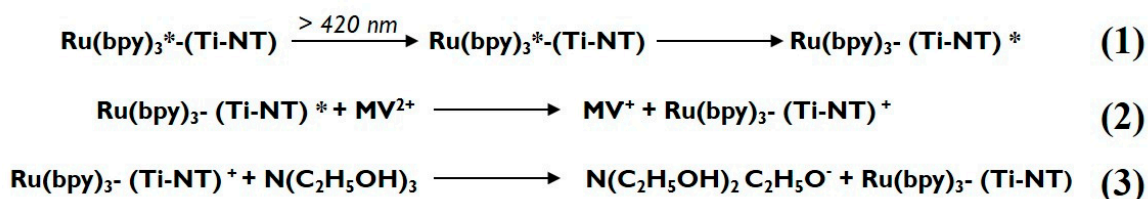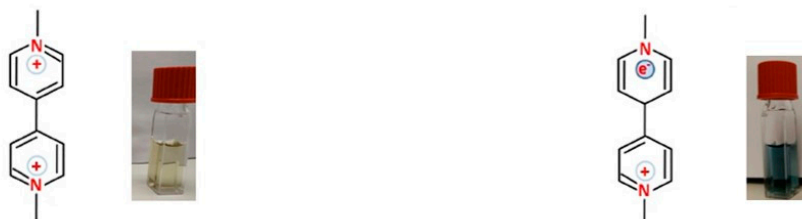

**Scheme S2.** Reactions that happens during photocatalytic reduction reaction of methyl viologen by  $(\text{Ru}(\text{bpy})_3)\text{Ti-NTs}$  utilizing visible light. Equation (1) is the photoexcitation of ruthenium complex with visible light followed by charge transfer to Ti-NT, equation (2) is the methyl viologen reduction reaction with excited form of  $(\text{Ru}(\text{bpy})_3)\text{Ti-NTs}$  and equation (3) corresponds to the reaction of the oxidant pair with the sacrificial agent tritethanolamine, (TEOA). Images on the bottom: on the left, image corresponds to the draw of dication methyl viologen ( $\text{MV}^{2+}$ ) and a photograph of a fresh solution of  $\text{MV}^{2+}$  that is yellowish-transparent and on the right, the draw and cuvette the blue liquid corresponding to the reduced specie of methyl viologen ( $\text{MV}^+$ ).[2]

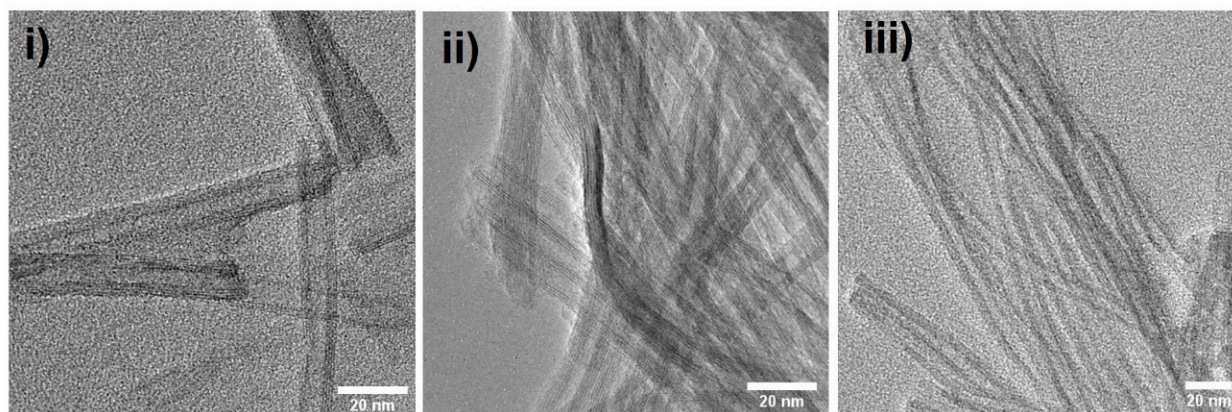

**Figure S1.** TEM images of titanates nanotubes conditioned at different (i) (H)Ti-NTs, (ii) (NaH)Ti-NTs and (iii) (Na)Ti-NTs.

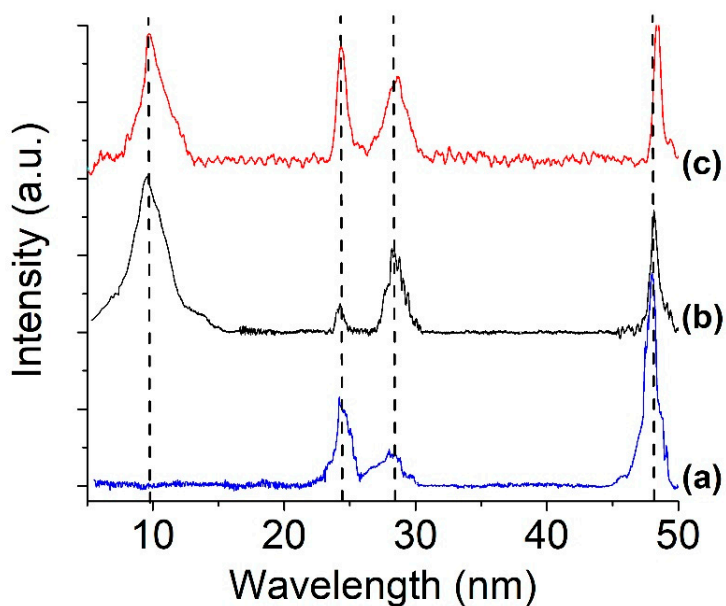

**Figure S2.** Experimental X-Ray diffraction patterns of the trititanate nanotubes samples: (a) (H)Ti-NTs, (b) (NaH)Ti-NTs and (c) (Na)Ti-NTs. The pics at 9.6°, 24.4°, 28.3°, and 48.° are relate to the titanate nanotubes facets (020), (110), (130) and (200) planes respectively.[3], [4]

$$\text{AQY \%} = \frac{e \cdot n \cdot N_A \cdot c \cdot h}{P \cdot t \cdot S \cdot \lambda_{inc}} \cdot 100$$

**Equation S1.** Formula employed for the calculation of the AQY % that derived from  $\text{AQY \%} = E \times R/I$  that means E electrons, R reaction rate and I incident photon flux (e) number of electros needed to produce the molecule, (n) amount of formed  $\text{H}_2$  in mol/time, ( $N_A$ ) Avogadro number in molec/mol, (c) speed of light in m/s, (h) as Planck's constant in J·s, P power density of the incident light in  $\text{J/s} \cdot \text{cm}^2$ , (S) is the incident light surface in the reactor in  $\text{cm}^2$ , (t) corresponds to the time of reaction in s and  $\lambda_{inc}$  as incident light wavelength .

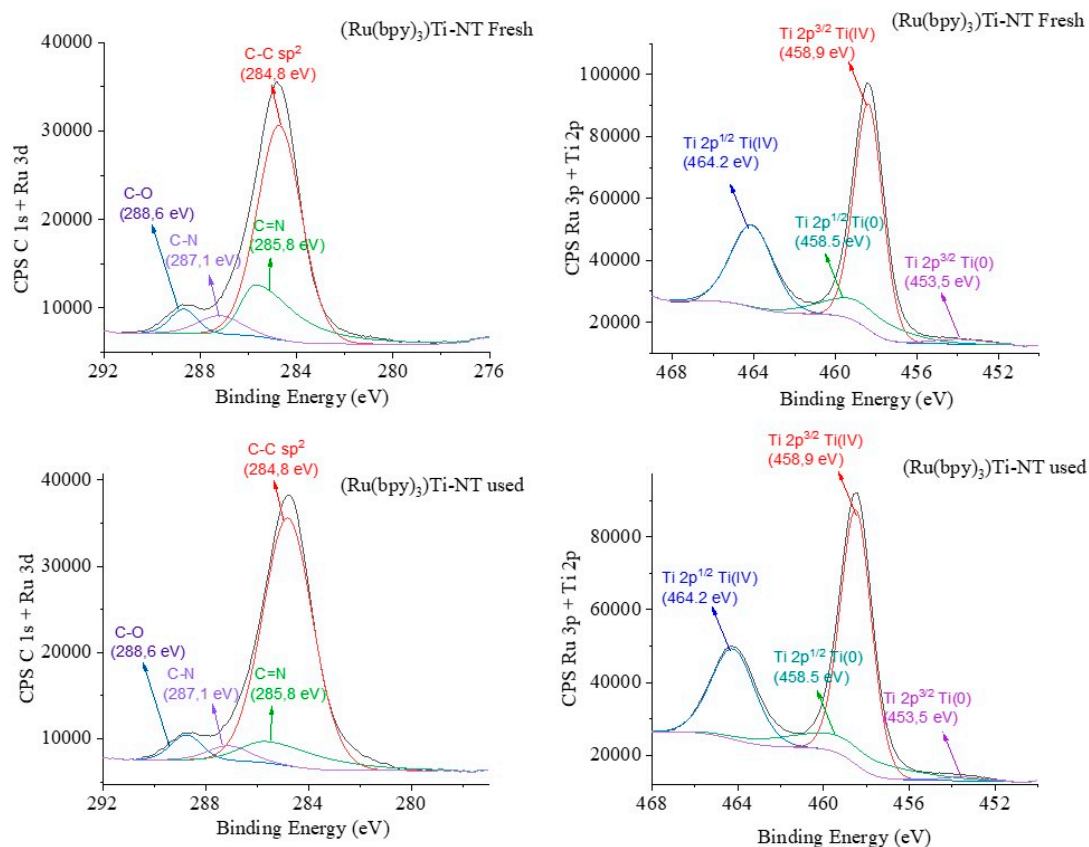

**Figure S3.** X-ray photoelectron spectrum of same (Ru(bpy)<sub>3</sub>)Ti-NT sample before (fresh) and after (used) overall water splitting photocatalysis

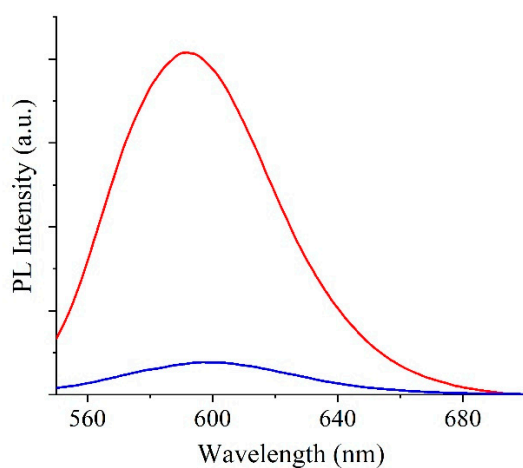

**Figure S4.** Photoluminescence spectrum of the phosphorescence of Ru(bpy)<sub>3</sub> in red and (Ru(bpy)<sub>3</sub>)Ti-NT in blue after excitation at 450 nm. Both samples had same absorbance at 450 nm.

### References.

- [1] “[Ru(bpy)<sub>3</sub>]<sup>2+</sup>\* and other remarkable metal-to-ligand charge transfer (MLCT) excited states,” *Pure and Applied Chemistry*, vol. 85, p. 1257, 2013.
- [2] T. W. Ebbesen, G. Levey, and L. K. Patterson, “Photoreduction of methyl viologen in aqueous neutral solution without additives,” *Nature*, vol. 298, no. 5874, pp. 545–548, 1982.
- [3] Q. Chen, W. Zhou, G. H. Du, and L.-M. Peng, “Trititanate Nanotubes Made via a Single Alkali Treatment,” *Adv. Mater.*, vol. 14, no. 17, pp. 1208–1211, Sep. 2002.
- [4] M. Zhang *et al.*, “Effect of annealing temperature on morphology, structure and photocatalytic behavior of nanotubed H<sub>2</sub>Ti<sub>2</sub>O<sub>4</sub>(OH)<sub>2</sub>,” *J. Mol. Catal. A Chem.*, vol. 217, no. 1, pp. 203–210, 2004.
